# Supplementary material for: Identification of SbWRKY Transcription Factors in Scutellaria baicalensis Georgi under Drought Stress and Their Relationship with Baicalin
Source: MDPI journal article supplement (doi:10.3390/agronomy13102564), 2023-10-05
Supplement: s1 [file s1]

|          |                               |         |     |     |    |     |     |     |           |           |      |
|----------|-------------------------------|---------|-----|-----|----|-----|-----|-----|-----------|-----------|------|
| SbWRKY11 | evm.model.contig62.22689.625  | 453     | 29  | 3   | 1  | 452 | 1   | 436 | 0.0       | 809       |      |
| SbWRKY10 | evm.model.contig62.15299.407  | 506     | 3   | 0   | 1  | 506 | 1   | 506 | 0.0       | 1048      |      |
| SbWRKY53 | evm.model.contig168.580       | 100.000 | 196 | 0   | 0  | 8   | 203 | 1   | 196       | 1.35e-152 | 413  |
| SbWRKY22 | evm.model.contig369.166       | 88.861  | 395 | 2   | 2  | 1   | 353 | 67  | 461       | 0.0       | 706  |
| SbWRKY3  | evm.model.contig78.10         | 94.951  | 614 | 2   | 3  | 1   | 612 | 1   | 587       | 0.0       | 1187 |
| SbWRKY4  | evm.model.contig310.2094.164  | 634     | 12  | 2   | 1  | 609 | 1   | 634 | 0.0       | 1201      |      |
| SbWRKY37 | evm.model.contig305.439       | 54.734  | 338 | 96  | 13 | 1   | 285 | 1   | 334       | 3.95e-104 | 299  |
| SbWRKY60 | evm.model.contig222.5240.845  | 142     | 66  | 7   | 1  | 138 | 1   | 128 | 3.33e-21  | 75.9      |      |
| SbWRKY46 | evm.model.contig51.12991.803  | 244     | 20  | 0   | 1  | 244 | 217 | 460 | 3.25e-164 | 457       |      |
| SbWRKY56 | evm.model.contig217.227       | 76.471  | 170 | 1   | 1  | 1   | 170 | 1   | 131       | 3.05e-79  | 225  |
| SbWRKY48 | evm.model.contig350.3487.773  | 229     | 3   | 3   | 1  | 227 | 1   | 206 | 1.19e-144 | 398       |      |
| SbWRKY38 | evm.model.contig350.3472.964  | 307     | 25  | 3   | 1  | 273 | 1   | 283 | 2.87e-150 | 414       |      |
| SbWRKY54 | evm.model.contig168.580       | 80.583  | 103 | 20  | 0  | 89  | 191 | 94  | 196       | 7.40e-63  | 186  |
| SbWRKY50 | evm.model.contig608.8         | 99.438  | 178 | 1   | 0  | 1   | 178 | 1   | 178       | 2.14e-131 | 366  |
| SbWRKY50 | evm.model.contig608.8         | 100.000 | 53  | 0   | 0  | 177 | 229 | 285 | 337       | 1.27e-33  | 116  |
| SbWRKY42 | evm.model.contig608.8         | 100.000 | 261 | 0   | 0  | 1   | 261 | 77  | 337       | 0.0       | 547  |
| SbWRKY21 | evm.model.contig233.374       | 90.368  | 353 | 0   | 1  | 1   | 353 | 1   | 319       | 0.0       | 644  |
| SbWRKY39 | evm.model.contig233.373       | 91.638  | 287 | 4   | 1  | 1   | 267 | 14  | 300       | 0.0       | 547  |
| SbWRKY29 | evm.model.contig233.6197.892  | 332     | 1   | 1   | 1  | 326 | 1   | 332 | 0.0       | 662       |      |
| SbWRKY52 | evm.model.contig193.393       | 84.274  | 248 | 2   | 2  | 1   | 211 | 70  | 317       | 9.09e-151 | 414  |
| SbWRKY34 | evm.model.contig370.272       | 84.814  | 349 | 0   | 1  | 1   | 296 | 143 | 491       | 0.0       | 594  |
| SbWRKY55 | evm.model.contig370.281       | 100.000 | 179 | 0   | 0  | 1   | 179 | 1   | 179       | 1.66e-131 | 363  |
| SbWRKY6  | evm.model.contig94.15193.762  | 529     | 9   | 2   | 1  | 529 | 1   | 505 | 0.0       | 1007      |      |
| SbWRKY14 | evm.model.contig64.13699.765  | 425     | 0   | 1   | 1  | 424 | 1   | 425 | 0.0       | 874       |      |
| SbWRKY35 | evm.model.contig64.39579.167  | 288     | 5   | 2   | 1  | 288 | 1   | 233 | 1.61e-167 | 456       |      |
| SbWRKY5  | evm.model.contig455.495       | 98.165  | 545 | 1   | 1  | 1   | 545 | 1   | 536       | 0.0       | 1101 |
| SbWRKY1  | evm.model.contig455.240       | 93.939  | 726 | 1   | 1  | 1   | 726 | 1   | 683       | 0.0       | 1312 |
| SbWRKY20 | evm.model.contig455.123       | 98.606  | 287 | 4   | 0  | 78  | 364 | 30  | 316       | 0.0       | 579  |
| SbWRKY20 | evm.model.contig455.123       | 48.611  | 72  | 32  | 2  | 227 | 295 | 348 | 417       | 1.74e-15  | 69.3 |
| SbWRKY9  | evm.model.contig507.289       | 99.802  | 506 | 1   | 0  | 1   | 506 | 1   | 506       | 0.0       | 1043 |
| SbWRKY36 | evm.model.contig600.176       | 45.390  | 282 | 114 | 11 | 38  | 286 | 49  | 323       | 3.74e-54  | 171  |
| SbWRKY49 | evm.model.contig507.5799.565  | 230     | 1   | 0   | 1  | 230 | 1   | 230 | 1.30e-176 | 476       |      |
| SbWRKY23 | evm.model.contig126.253       | 99.693  | 326 | 1   | 0  | 1   | 326 | 1   | 326       | 0.0       | 677  |
| SbWRKY16 | evm.model.contig300.258       | 100.000 | 413 | 0   | 0  | 1   | 413 | 1   | 413       | 0.0       | 862  |
| SbWRKY16 | evm.model.contig300.258       | 36.697  | 109 | 56  | 2  | 159 | 254 | 345 | 453       | 1.73e-17  | 75.9 |
| SbWRKY27 | evm.model.contig509.3299.695  | 328     | 1   | 0   | 1  | 328 | 1   | 328 | 0.0       | 685       |      |
| SbWRKY17 | evm.model.contig509.8584.075  | 427     | 11  | 3   | 40 | 409 | 2   | 428 | 0.0       | 715       |      |
| SbWRKY57 | evm.model.contig509.284       | 100.000 | 171 | 0   | 0  | 1   | 171 | 63  | 233       | 1.46e-133 | 365  |
| SbWRKY13 | evm.model.contig28.20         | 95.059  | 425 | 2   | 2  | 1   | 423 | 1   | 408       | 0.0       | 818  |
| SbWRKY13 | evm.model.contig28.20         | 55.932  | 59  | 19  | 1  | 228 | 279 | 384 | 442       | 4.25e-17  | 74.7 |
| SbWRKY25 | evm.model.contig28.20         | 81.638  | 403 | 4   | 3  | 1   | 333 | 1   | 403       | 0.0       | 641  |
| SbWRKY25 | evm.model.contig28.20         | 48.000  | 50  | 19  | 1  | 150 | 192 | 393 | 442       | 6.86e-10  | 51.6 |
| SbWRKY8  | evm.model.contig184.7589.876  | 563     | 2   | 2   | 1  | 508 | 1   | 563 | 0.0       | 1011      |      |
| SbWRKY32 | evm.model.contig95.6          | 99.675  | 308 | 1   | 0  | 1   | 308 | 1   | 308       | 0.0       | 649  |
| SbWRKY45 | evm.model.contig340.7999.615  | 260     | 0   | 1   | 1  | 259 | 1   | 260 | 0.0       | 530       |      |
| SbWRKY18 | evm.model.contig61.15999.500  | 400     | 2   | 0   | 1  | 400 | 1   | 400 | 0.0       | 822       |      |
| SbWRKY33 | evm.model.contig239.7095.912  | 318     | 1   | 1   | 1  | 306 | 1   | 318 | 0.0       | 625       |      |
| SbWRKY2  | evm.model.contig454.4         | 99.805  | 513 | 1   | 0  | 110 | 622 | 5   | 517       | 0.0       | 1059 |
| SbWRKY19 | evm.model.contig197.173       | 99.229  | 389 | 0   | 2  | 9   | 395 | 1   | 388       | 0.0       | 791  |
| SbWRKY47 | evm.model.contig265.9         | 98.824  | 255 | 3   | 0  | 1   | 255 | 1   | 255       | 0.0       | 521  |
| SbWRKY41 | evm.model.contig227.35100.000 | 262     | 0   | 0   | 1  | 262 | 1   | 262 | 0.0       | 535       |      |
| SbWRKY12 | evm.model.contig564.8299.543  | 438     | 2   | 0   | 1  | 438 | 1   | 438 | 0.0       | 913       |      |
| SbWRKY7  | evm.model.contig564.2299.619  | 525     | 2   | 0   | 1  | 525 | 1   | 525 | 0.0       | 1071      |      |

|          |                              |         |     |    |     |     |     |     |           |           |      |
|----------|------------------------------|---------|-----|----|-----|-----|-----|-----|-----------|-----------|------|
| SbWRKY7  | evm.model.contig564.2258.333 | 60      | 24  | 1  | 335 | 393 | 505 | 564 | 2.83e-17  | 76.3      |      |
| SbWRKY40 | evm.model.contig106.1999.242 | 264     | 0   | 1  | 1   | 264 | 1   | 262 | 0.0       | 536       |      |
| SbWRKY15 | evm.model.contig522.646      | 100.000 | 285 | 0  | 0   | 139 | 423 | 1   | 285       | 0.0       | 601  |
| SbWRKY31 | evm.model.contig522.788      | 100.000 | 309 | 0  | 0   | 1   | 309 | 1   | 309       | 0.0       | 640  |
| SbWRKY43 | evm.model.contig522.833      | 77.027  | 222 | 0  | 1   | 91  | 261 | 11  | 232       | 1.64e-116 | 326  |
| SbWRKY43 | evm.model.contig522.833      | 90.909  | 11  | 1  | 0   | 1   | 11  | 1   | 11        | 0.004     | 29.3 |
| SbWRKY51 | evm.model.contig522.1141     | 98.462  | 195 | 3  | 0   | 27  | 221 | 16  | 210       | 1.65e-148 | 404  |
| SbWRKY44 | evm.model.contig522.1336     | 99.615  | 260 | 1  | 0   | 1   | 260 | 1   | 260       | 0.0       | 546  |
| SbWRKY26 | evm.model.contig522.1609     | 99.698  | 331 | 1  | 0   | 1   | 331 | 1   | 331       | 0.0       | 696  |
| SbWRKY59 | evm.model.contig522.829      | 61.111  | 54  | 20 | 1   | 76  | 128 | 29  | 82        | 2.86e-18  | 67.4 |
| SbWRKY30 | evm.model.contig522.1657     | 98.418  | 316 | 5  | 0   | 1   | 316 | 1   | 316       | 0.0       | 649  |
| SbWRKY58 | evm.model.contig480.3799.338 | 151     | 1   | 0  | 1   | 151 | 172 | 322 | 4.22e-113 |           | 316  |
| SbWRKY28 | evm.model.contig600.176      | 100.000 | 326 | 0  | 0   | 1   | 326 | 1   | 326       | 0.0       | 680  |
| SbWRKY24 | evm.model.contig305.439      | 100.000 | 334 | 0  | 0   | 1   | 334 | 1   | 334       | 0.0       | 691  |
